# Supplementary material
Source: HighWire-hosted journal article supplement (https://jitc.bmj.com/content/8/2/e000990)
Supplement: inline-supplementary-material-3 [file inline-supplementary-material-3.pdf]

## Supplementary Figure 3

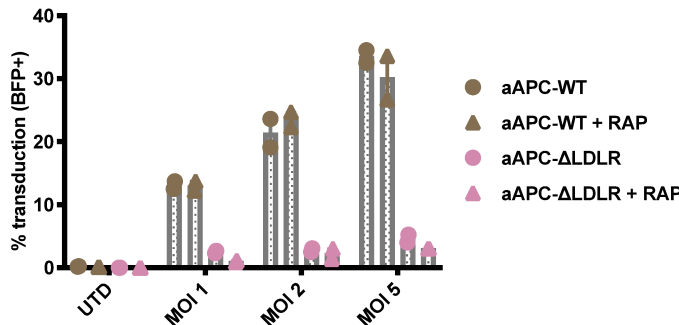

### Supplementary Figure 3. Knockout of the LDLR is sufficient to make K562-based aAPC resistant to VSV-LV transduction.

Susceptibility of irradiated aAPC-WT and aAPC- $\Delta$ LDLR to VSV-LV transduction in the presence or absence of RAP was assessed using a BFP-encoding lentiviral vector at various MOIs. The percentage of BFP<sup>+</sup> aAPC (GFP<sup>+</sup>mCherry<sup>+</sup>) was measured after 48h by flow cytometry. Bars show mean  $\pm$  SEM of experiment performed in duplicate. RAP: receptor-associated protein
